# Supplementary material
Source: ML conference proceedings conference paper supplement (https://openaccess.thecvf.com/content/CVPR2022/html/Zheng_GAT-CADNet_Graph_Attention_CVPR_2022_paper.html)
Supplement: Supplementary file 1 [file Zheng_GAT-CADNet_Graph_Attention_CVPR_2022_supplemental.pdf]

# GAT-CADNet: Graph Attention Network for Panoptic Symbol Spotting in CAD Drawings

## Supplementary Material

As the space limitation in the paper, more quantitative and qualitative results are illustrated in supplementary material part.

### A. Quantitative results

**More ablation study.** Two more extra experiments are conducted to further prove the superiority of our model. One is using graph convolution network(GCN) as baseline. Similar to GAT, GCN is also a widely used graph neural network. Thus, we replace GAT stages in our model with GCN stages and take the normalized Laplacian matrix equivalently to one head attention score in our RSE and CEE modules. Another is using vertices features only. Once the center coordinates are added to current vertices features, spacial relationship can be figured out with any two given segments. To verify the necessity of explicitly encoded edge features in our model, we conduct another experiment with only vertices features. As shown in Tab. 4, neither of two extra experiments reaches the performance of our baseline, let alone our best model.

**Quantitative results.** As the space limitation in main body, only the total evaluation results of panoptic quality(PQ), segmentation quality(SQ) and recognition quality(RQ) are shown ahead. Here we provide the evaluation results of each class in Tab. 5.

### B. Qualitative results

Visualized results of more cases are illustrated in this section. Fig. 13 and Fig. 14 show the cases of residential buildings and core of towers, in which things and stuff are usually in regular layout, and are also the cases in which our model gives best results. Fig. 15 are plans of shopping malls, which have lager amount of stuff including parking and curtain wall. Our model also performs well in these cases. Fig. 16 and Fig. 17 are cases of schools, in which tables and chairs are arrayed orderly and densely. Although some instances have lower confidence, most instances are well segmented.

Furthermore, all figures are illustrated as vector graph, such that details can be shown clearly after zooming in. Annotations and confidence are labeled on the upper left corner of the instances blocks. Segments belong to different classes are drawn with different colors, while background segments are drawn in light gray.

| Model             | RQ           | SQ           | PQ           |
|-------------------|--------------|--------------|--------------|
| our baseline      | 0.687        | 0.875        | 0.602        |
| GCN based         | 0.655        | 0.859        | 0.563        |
| w/o edge features | 0.599        | 0.850        | 0.509        |
| ours              | <b>0.807</b> | <b>0.914</b> | <b>0.737</b> |

Table 4. Extra experiments. GCN based model and GAT without edge features show inferior results.

### C. limitations

Our GAT-CADNet treats the instance symbol spotting as a subgraph detection problem, with proposed RSE and CEE modules, surpasses existing state-of-the-art methods by a large margin. There are still limitations. Two failed cases are shown in Fig. 18. For some cases, simple symbols could be missing or wrongly recognized with mistaken labeled or lager variation in graph, e.g. our model misses all L shape tables (upper) and recognizes all windows as curtain wall (lower) by mistake. Future work would be focusing on failed cases and improving the robustness of our model.

| class            | Baseline    |             |             | Baseline + RSE |      |             | Baseline + CEE |             |             | Baseline + RSE + CEE |             |             |
|------------------|-------------|-------------|-------------|----------------|------|-------------|----------------|-------------|-------------|----------------------|-------------|-------------|
|                  | RQ          | SQ          | PQ          | RQ             | SQ   | PQ          | RQ             | SQ          | PQ          | RQ                   | SQ          | PQ          |
| single door      | 0.78        | 0.91        | 0.71        | 0.84           | 0.93 | 0.78        | 0.88           | 0.93        | 0.82        | <b>0.91</b>          | <b>0.95</b> | <b>0.86</b> |
| double door      | 0.82        | 0.91        | 0.75        | 0.86           | 0.93 | 0.80        | 0.84           | 0.93        | 0.79        | <b>0.89</b>          | <b>0.94</b> | <b>0.83</b> |
| sliding door     | 0.89        | 0.94        | 0.83        | 0.90           | 0.94 | 0.85        | 0.90           | 0.95        | 0.85        | <b>0.94</b>          | <b>0.96</b> | <b>0.91</b> |
| folding door     | 0.34        | 0.85        | 0.29        | <b>0.46</b>    | 0.90 | <b>0.42</b> | 0.39           | <b>0.91</b> | 0.35        | 0.45                 | 0.89        | 0.40        |
| revolving door   | <b>0.00</b> | <b>0.00</b> | <b>0.00</b> | 0.00           | 0.00 | 0.00        | 0.00           | 0.00        | 0.00        | 0.00                 | 0.00        | 0.00        |
| shutter door     | <b>0.00</b> | <b>0.00</b> | <b>0.00</b> | 0.00           | 0.00 | 0.00        | 0.00           | 0.00        | 0.00        | 0.00                 | 0.00        | 0.00        |
| window           | 0.69        | 0.81        | 0.56        | 0.71           | 0.82 | 0.58        | 0.74           | 0.81        | 0.60        | <b>0.79</b>          | <b>0.84</b> | <b>0.66</b> |
| bay window       | <b>0.00</b> | <b>0.00</b> | <b>0.00</b> | 0.00           | 0.00 | 0.00        | 0.00           | 0.00        | 0.00        | 0.00                 | 0.00        | 0.00        |
| shutter window   | 0.69        | 0.82        | 0.56        | 0.75           | 0.85 | 0.64        | 0.74           | 0.84        | 0.62        | <b>0.76</b>          | <b>0.87</b> | <b>0.66</b> |
| opening symbol   | <b>0.00</b> | <b>0.00</b> | <b>0.00</b> | 0.00           | 0.00 | 0.00        | 0.00           | 0.00        | 0.00        | 0.00                 | 0.00        | 0.00        |
| sofa             | 0.40        | 0.81        | 0.32        | 0.47           | 0.89 | 0.42        | 0.36           | 0.91        | 0.33        | <b>0.61</b>          | <b>0.96</b> | <b>0.59</b> |
| bed              | 0.68        | 0.90        | 0.61        | 0.68           | 0.88 | 0.60        | 0.64           | 0.91        | 0.58        | <b>0.78</b>          | <b>0.91</b> | <b>0.72</b> |
| chair            | 0.38        | 0.84        | 0.32        | 0.58           | 0.85 | 0.49        | 0.66           | <b>0.94</b> | 0.62        | <b>0.84</b>          | 0.93        | <b>0.78</b> |
| table            | 0.36        | 0.88        | 0.32        | 0.31           | 0.88 | 0.27        | 0.40           | 0.93        | 0.37        | <b>0.57</b>          | <b>0.94</b> | <b>0.53</b> |
| TV cabinet       | 0.45        | 0.84        | 0.38        | 0.54           | 0.83 | 0.45        | 0.39           | 0.87        | 0.34        | <b>0.73</b>          | <b>0.94</b> | <b>0.69</b> |
| wardrobe         | 0.75        | 0.81        | 0.61        | 0.67           | 0.81 | 0.55        | 0.71           | 0.87        | 0.62        | <b>0.84</b>          | <b>0.92</b> | <b>0.77</b> |
| cabinet          | 0.20        | 0.79        | 0.16        | 0.21           | 0.82 | 0.18        | 0.18           | 0.80        | 0.14        | <b>0.44</b>          | <b>0.85</b> | <b>0.37</b> |
| gas stove        | 0.92        | 0.96        | 0.88        | 0.81           | 0.95 | 0.77        | 0.92           | 0.96        | 0.88        | <b>0.94</b>          | <b>0.98</b> | <b>0.92</b> |
| sink             | 0.75        | 0.93        | 0.69        | 0.78           | 0.93 | 0.72        | 0.77           | 0.94        | 0.73        | <b>0.81</b>          | <b>0.95</b> | <b>0.77</b> |
| refrigerator     | 0.72        | 0.81        | 0.58        | 0.72           | 0.87 | 0.62        | 0.76           | 0.85        | 0.64        | <b>0.88</b>          | <b>0.93</b> | <b>0.82</b> |
| air conditioning | 0.46        | 0.89        | 0.41        | 0.59           | 0.92 | 0.55        | <b>0.68</b>    | 0.96        | <b>0.66</b> | 0.66                 | <b>0.97</b> | 0.64        |
| bath             | 0.24        | 0.77        | 0.19        | 0.31           | 0.77 | 0.24        | 0.36           | <b>0.80</b> | 0.29        | <b>0.46</b>          | 0.79        | <b>0.36</b> |
| bathtub          | 0.51        | 0.78        | 0.40        | 0.54           | 0.85 | 0.46        | 0.63           | 0.81        | 0.51        | <b>0.68</b>          | <b>0.88</b> | <b>0.59</b> |
| washing machine  | 0.74        | 0.85        | 0.63        | 0.61           | 0.86 | 0.53        | 0.69           | 0.86        | 0.59        | <b>0.75</b>          | <b>0.94</b> | <b>0.70</b> |
| urinal           | 0.91        | 0.97        | 0.89        | 0.92           | 0.97 | 0.89        | 0.92           | 0.98        | 0.90        | <b>0.94</b>          | <b>0.99</b> | <b>0.92</b> |
| squat toilet     | 0.88        | 0.90        | 0.79        | 0.91           | 0.93 | 0.85        | 0.77           | 0.93        | 0.72        | <b>0.92</b>          | <b>0.96</b> | <b>0.88</b> |
| toilet           | 0.88        | 0.96        | 0.84        | 0.89           | 0.97 | 0.87        | 0.91           | 0.96        | 0.88        | <b>0.94</b>          | <b>0.99</b> | <b>0.93</b> |
| stairs           | 0.53        | 0.83        | 0.44        | 0.62           | 0.86 | 0.53        | 0.68           | 0.86        | 0.58        | <b>0.74</b>          | <b>0.90</b> | <b>0.66</b> |
| elevator         | 0.76        | 0.92        | 0.70        | 0.82           | 0.93 | 0.76        | 0.81           | 0.93        | 0.75        | <b>0.84</b>          | <b>0.95</b> | <b>0.80</b> |
| escalator        | 0.17        | 0.73        | 0.12        | 0.23           | 0.74 | 0.17        | <b>0.25</b>    | 0.74        | <b>0.18</b> | 0.22                 | <b>0.78</b> | 0.17        |
| row seat         | 0.26        | 0.90        | 0.23        | 0.46           | 0.92 | 0.42        | 0.33           | 0.92        | 0.30        | <b>0.49</b>          | <b>0.93</b> | <b>0.45</b> |
| parking          | <b>0.83</b> | 0.88        | 0.73        | 0.82           | 0.90 | 0.74        | 0.77           | 0.86        | 0.66        | 0.82                 | <b>0.90</b> | <b>0.74</b> |
| wall             | 0.66        | 0.71        | 0.47        | 0.72           | 0.74 | 0.53        | 0.68           | 0.72        | 0.48        | <b>0.76</b>          | <b>0.76</b> | <b>0.58</b> |
| curtain wall     | 0.28        | 0.77        | 0.22        | 0.33           | 0.74 | 0.24        | 0.21           | 0.75        | 0.15        | <b>0.40</b>          | <b>0.78</b> | <b>0.32</b> |
| handrail         | 0.12        | 0.65        | 0.08        | 0.14           | 0.72 | 0.10        | 0.10           | 0.69        | 0.07        | <b>0.27</b>          | <b>0.78</b> | <b>0.21</b> |
| total            | 0.69        | 0.87        | 0.60        | 0.73           | 0.90 | 0.65        | 0.75           | 0.90        | 0.67        | <b>0.80</b>          | <b>0.91</b> | <b>0.74</b> |

Table 5. Quantitative results for semantic symbol spotting, instance symbol spotting and panoptic symbol spotting of each class. There are classes in test split with few instances leading to zeros and very low values in results. The total result are weighed with the number of each class.

1296  
1297  
1298  
1299  
1300  
1301  
1302  
1303  
1304  
1305  
1306  
1307  
1308  
1309  
1310  
1311  
1312  
1313  
1314  
1315  
1316  
1317  
1318  
1319  
1320  
1321  
1322  
1323  
1324  
1325  
1326  
1327  
1328  
1329  
1330  
1331  
1332  
1333  
1334  
1335  
1336  
1337  
1338  
1339  
1340  
1341  
1342  
1343  
1344  
1345  
1346  
1347  
1348  
1349

1350  
1351  
1352  
1353  
1354  
1355  
1356  
1357  
1358  
1359  
1360  
1361  
1362  
1363  
1364  
1365  
1366  
1367  
1368  
1369  
1370  
1371  
1372  
1373  
1374  
1375  
1376  
1377  
1378  
1379  
1380  
1381  
1382  
1383  
1384  
1385  
1386  
1387  
1388  
1389  
1390  
1391  
1392  
1393  
1394  
1395  
1396  
1397  
1398  
1399  
1400  
1401  
1402  
1403

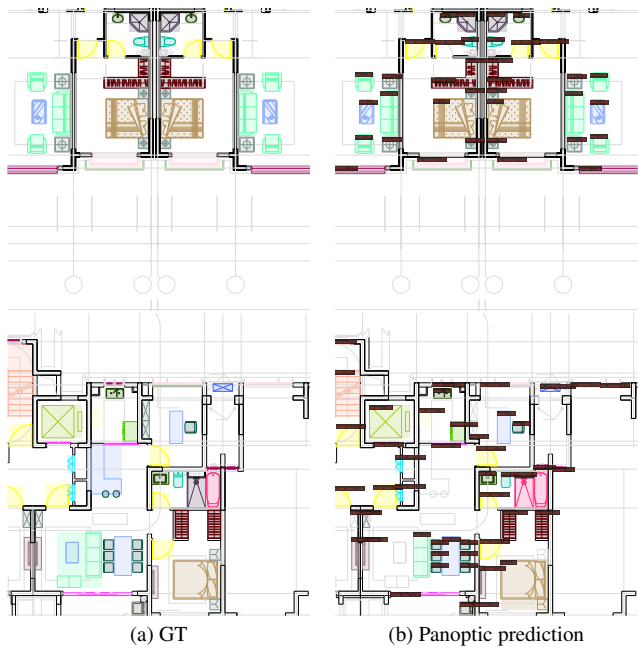

Figure 13. Results of GAT-CADNet on FloorPlanCAD, see the main body for annotation details. The images are part of our test split of residential building CAD drawings.

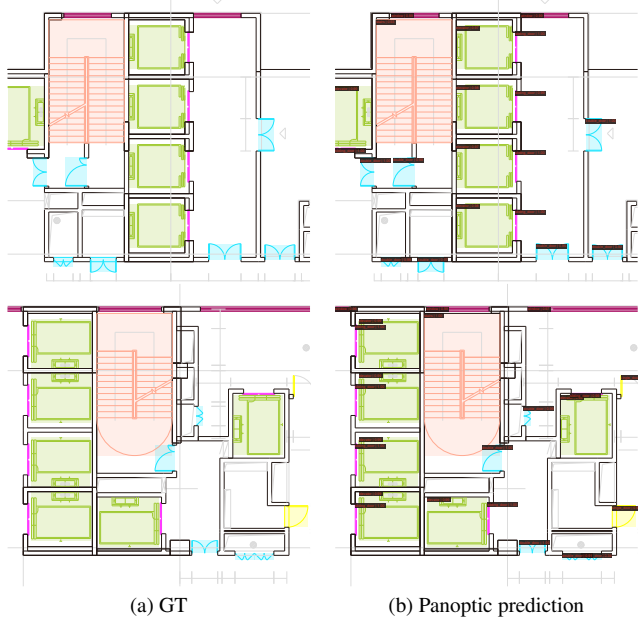

Figure 14. Results of GAT-CADNet on FloorPlanCAD, see the main body for annotation details. The images are part of our test split of tower CAD drawings.

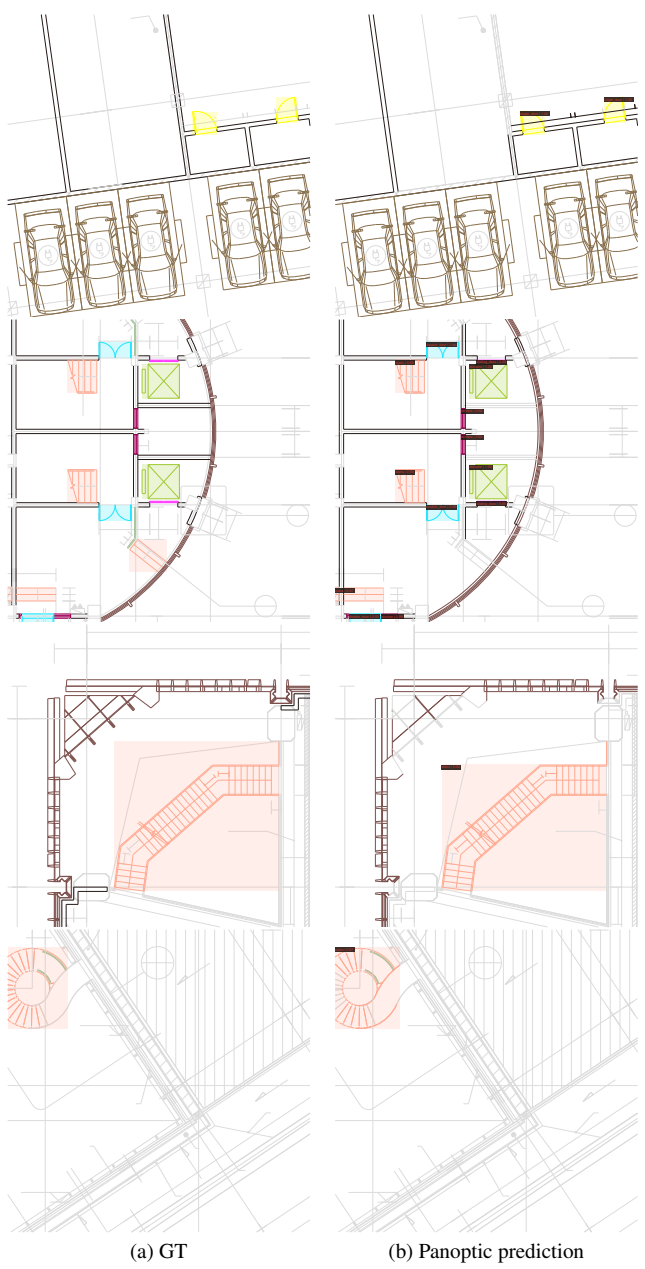

Figure 15. Results of GAT-CADNet on FloorPlanCAD, see the main body for annotation details. The images are part of our test split of shopping mall CAD drawings.

1404  
1405  
1406  
1407  
1408  
1409  
1410  
1411  
1412  
1413  
1414  
1415  
1416  
1417  
1418  
1419  
1420  
1421  
1422  
1423  
1424  
1425  
1426  
1427  
1428  
1429  
1430  
1431  
1432  
1433  
1434  
1435  
1436  
1437  
1438  
1439  
1440  
1441  
1442  
1443  
1444  
1445  
1446  
1447  
1448  
1449  
1450  
1451  
1452  
1453  
1454  
1455  
1456  
1457

1458  
1459  
1460  
1461  
1462  
1463  
1464  
1465  
1466  
1467  
1468  
1469  
1470  
1471  
1472  
1473  
1474  
1475  
1476  
1477  
1478  
1479  
1480  
1481  
1482  
1483  
1484  
1485  
1486  
1487  
1488  
1489  
1490  
1491  
1492  
1493  
1494  
1495  
1496  
1497  
1498  
1499  
1500  
1501  
1502  
1503  
1504  
1505  
1506  
1507  
1508  
1509  
1510  
1511

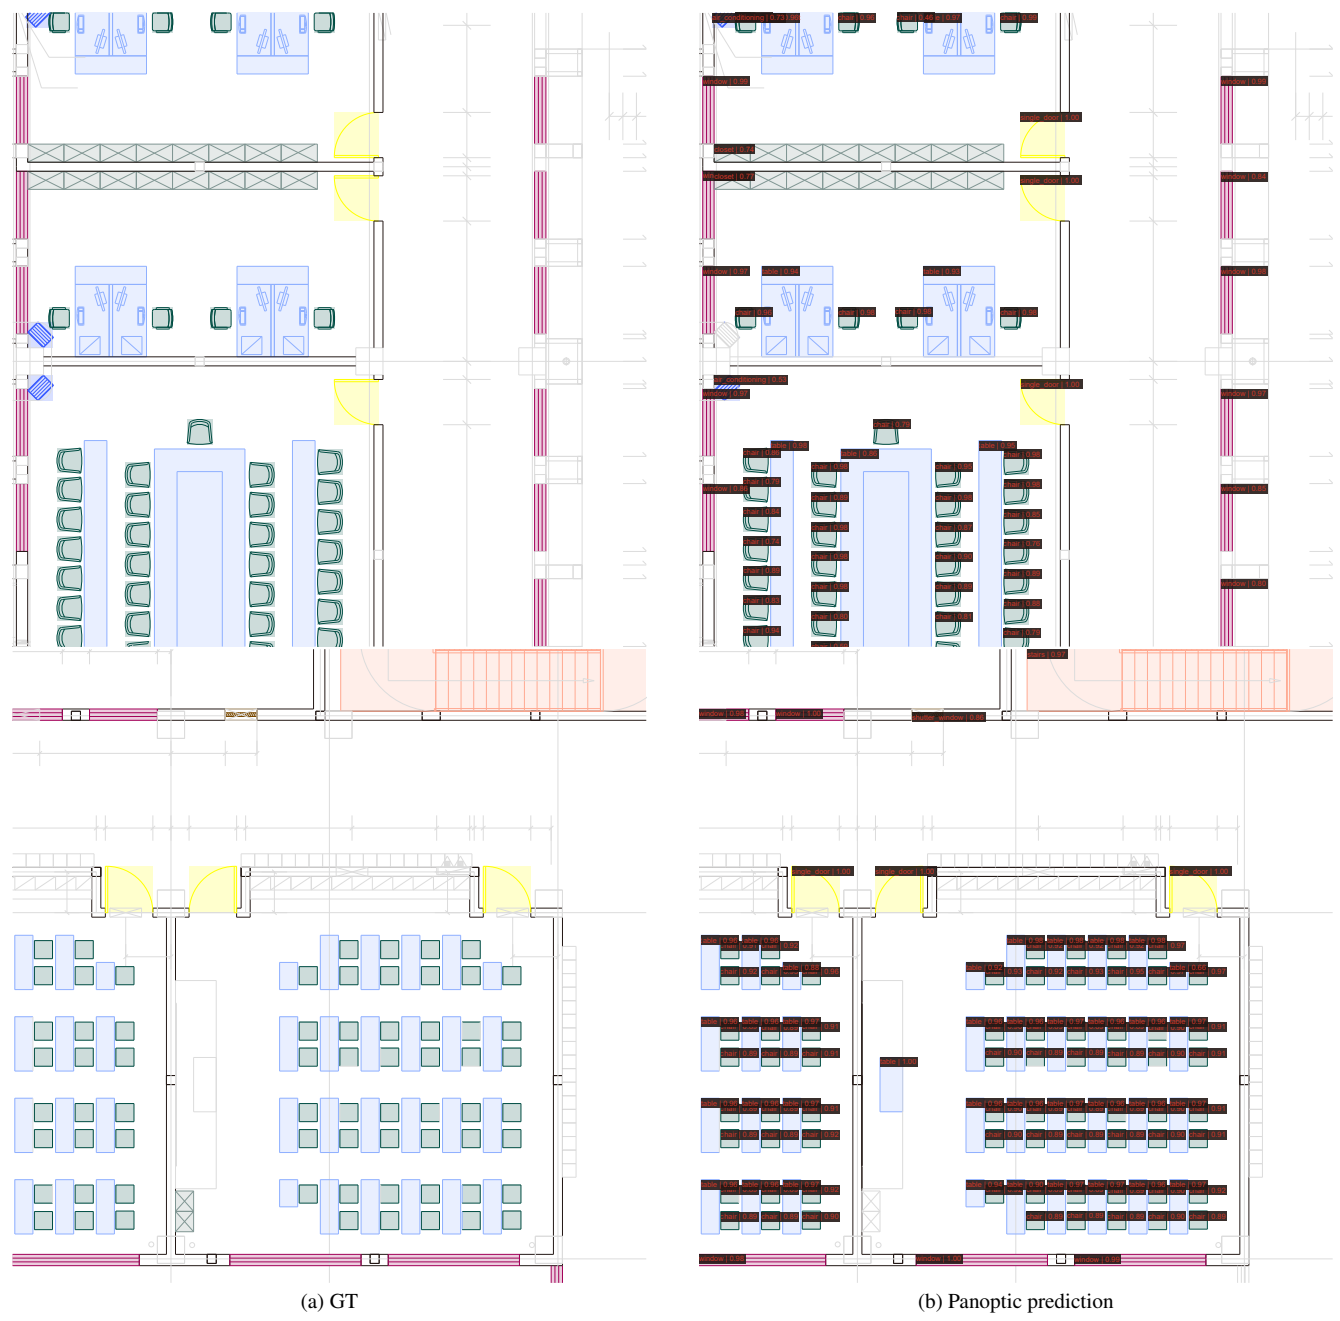

Figure 16. Results of GAT-CADNet on FloorPlanCAD, see the main body for annotation details. The images are part of our test split of school CAD drawings.

1512  
1513  
1514  
1515  
1516  
1517  
1518  
1519  
1520  
1521  
1522  
1523  
1524  
1525  
1526  
1527  
1528  
1529  
1530  
1531  
1532  
1533  
1534  
1535  
1536  
1537  
1538  
1539  
1540  
1541  
1542  
1543  
1544  
1545  
1546  
1547  
1548  
1549  
1550  
1551  
1552  
1553  
1554  
1555  
1556  
1557  
1558  
1559  
1560  
1561  
1562  
1563  
1564  
1565

1566  
1567  
1568  
1569  
1570  
1571  
1572  
1573  
1574  
1575  
1576  
1577  
1578  
1579  
1580  
1581  
1582  
1583  
1584  
1585  
1586  
1587  
1588  
1589  
1590  
1591  
1592  
1593  
1594  
1595  
1596  
1597  
1598  
1599  
1600  
1601  
1602  
1603  
1604  
1605  
1606  
1607  
1608  
1609  
1610  
1611  
1612  
1613  
1614  
1615  
1616  
1617  
1618  
1619

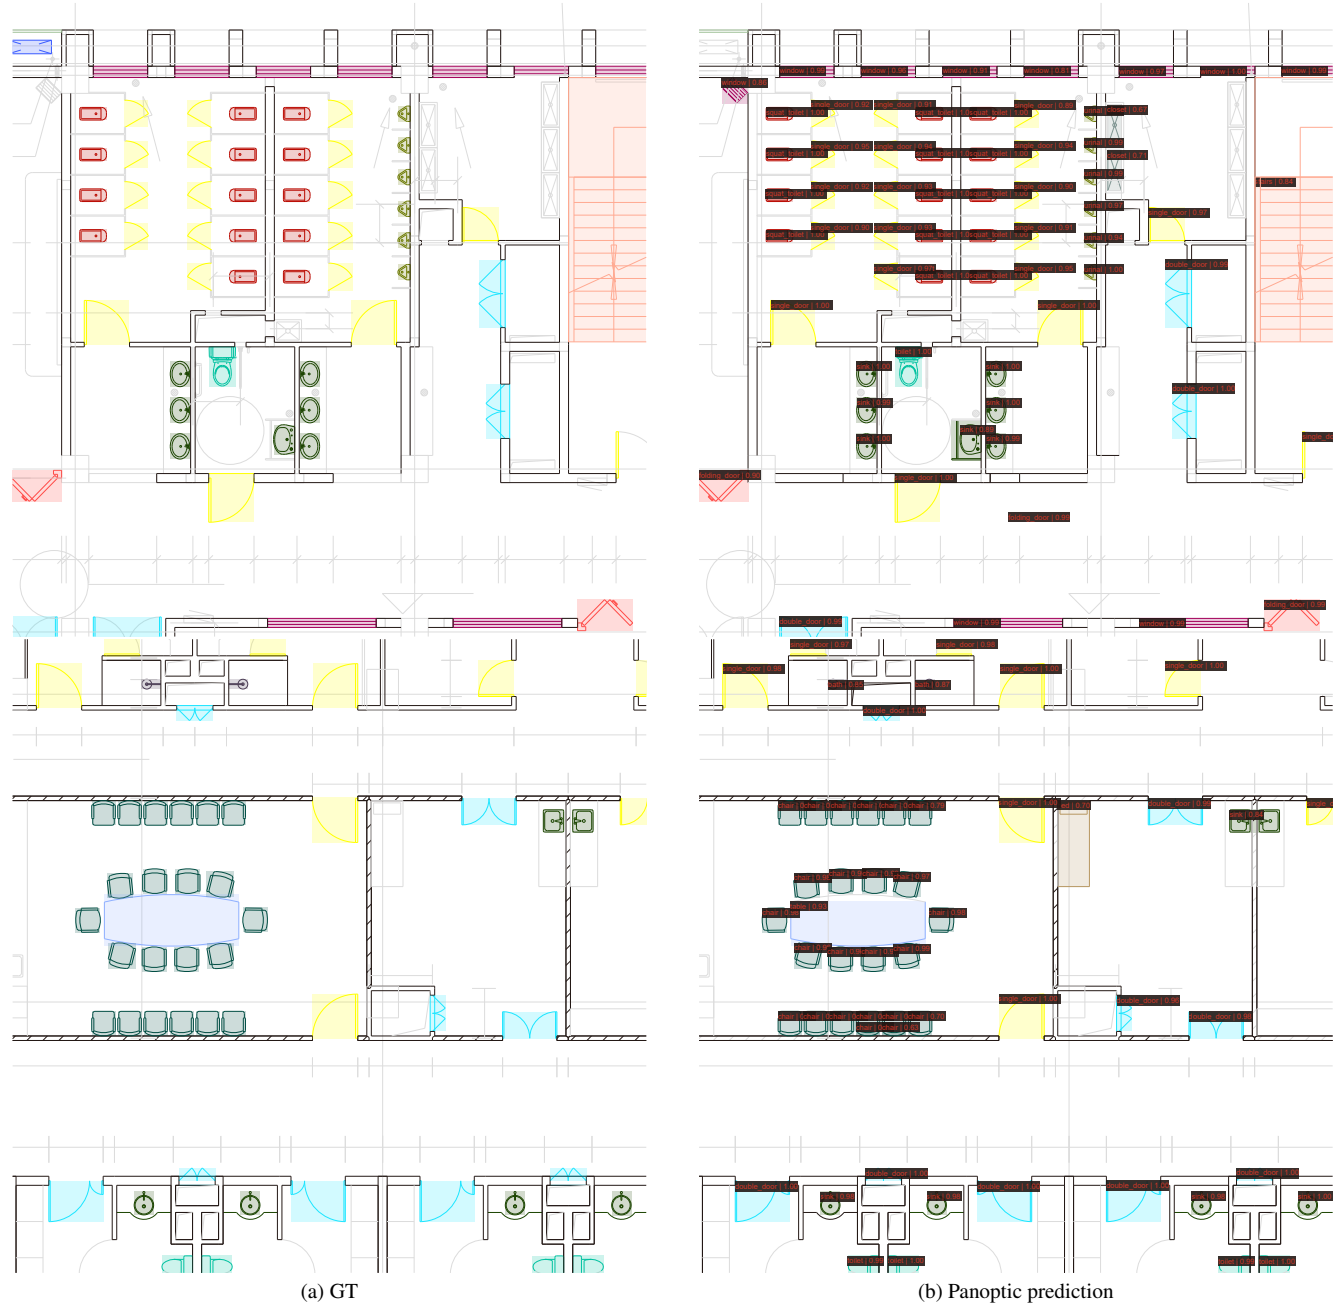

Figure 17. Results of GAT-CADNet on FloorPlanCAD, see the main body for annotation details. The images are part of our test split of public building CAD drawings

1620  
1621  
1622  
1623  
1624  
1625  
1626  
1627  
1628  
1629  
1630  
1631  
1632  
1633  
1634  
1635  
1636  
1637  
1638  
1639  
1640  
1641  
1642  
1643  
1644  
1645  
1646  
1647  
1648  
1649  
1650  
1651  
1652  
1653  
1654  
1655  
1656  
1657  
1658  
1659  
1660  
1661  
1662  
1663  
1664  
1665  
1666  
1667  
1668  
1669  
1670  
1671  
1672  
1673

1674  
1675  
1676  
1677  
1678  
1679  
1680  
1681  
1682  
1683  
1684  
1685  
1686  
1687  
1688  
1689  
1690  
1691  
1692  
1693  
1694  
1695  
1696  
1697  
1698  
1699  
1700  
1701  
1702  
1703  
1704  
1705  
1706  
1707  
1708  
1709  
1710  
1711  
1712  
1713  
1714  
1715  
1716  
1717  
1718  
1719  
1720  
1721  
1722  
1723  
1724  
1725  
1726  
1727

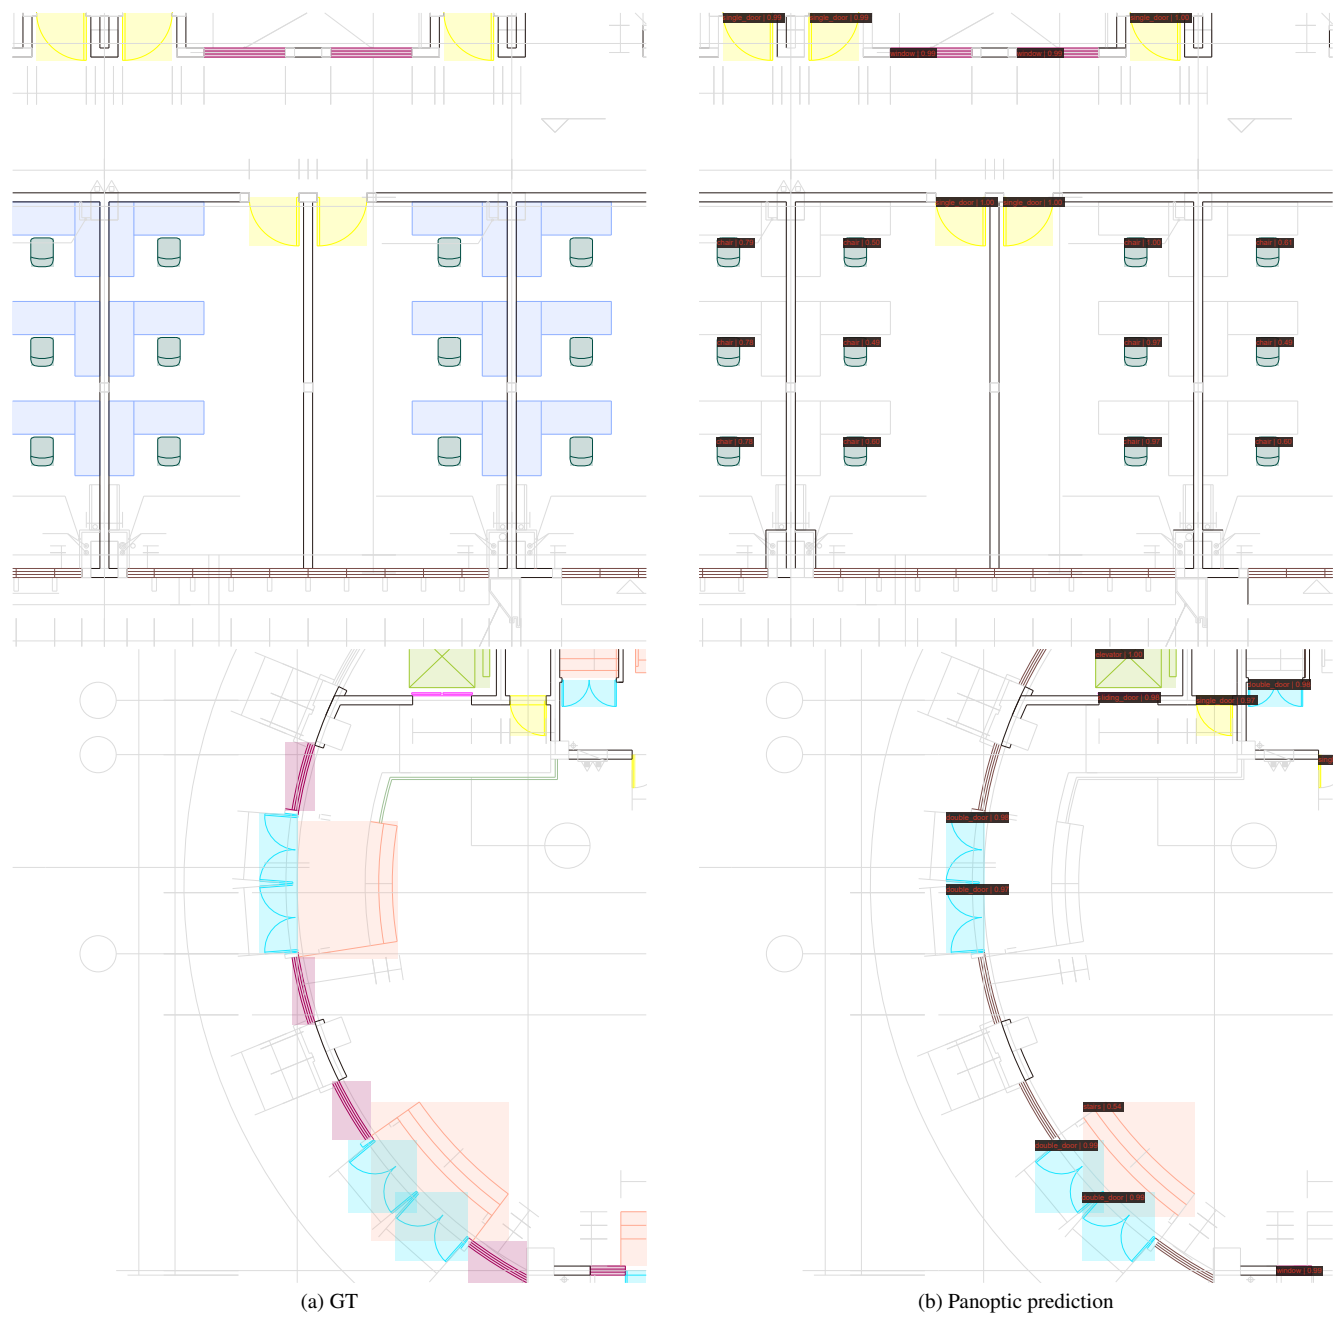

Figure 18. Two typical failed cases of GAT-CADNet. All L shape tables in upper are missing and all windows in lower are recognized as curtain wall by mistake.
